# Supplementary material for: Integration of Evolutionary Features for the Identification of Functionally Important Residues in Major Facilitator Superfamily Transporters
Source: PubMed Central journal article supplement (PMC2739438; doi:10.1371/journal.pcbi.1000522), 2009-10-02
Supplement: pcbi.1000522.s003.pdf [file pcbi.1000522.s003.pdf]

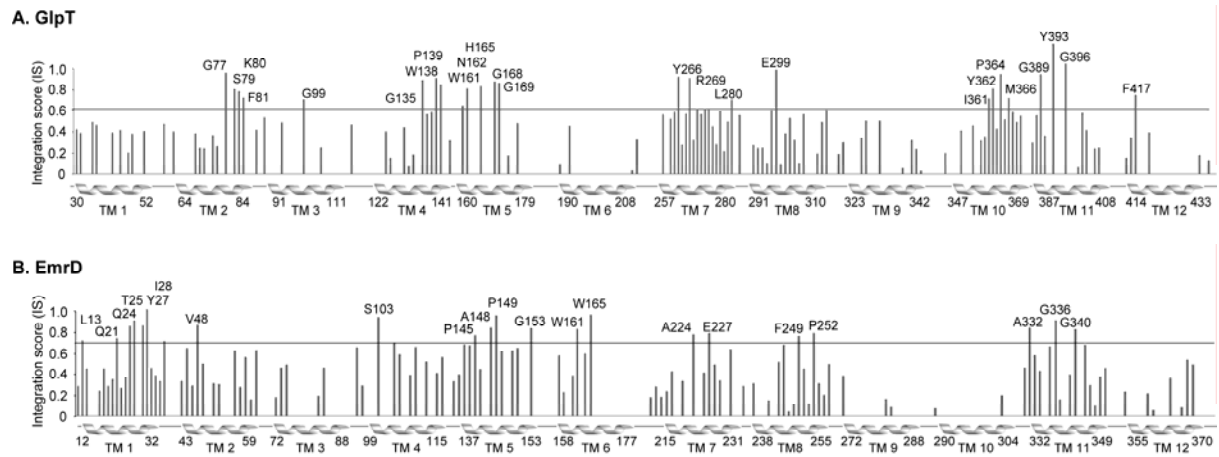

Figure S3. IS pattern of GlpT and EmrD. (A) In GlpT, 25 detected residues are labeled with residue numbers. Black line corresponds to the 90<sup>th</sup> percentile of IS. (B) In EmrD, 21 detected residues are labeled with residue numbers.
