# Supplementary material for: Integration of Evolutionary Features for the Identification of Functionally Important Residues in Major Facilitator Superfamily Transporters
Source: PubMed Central journal article supplement (PMC2739438; doi:10.1371/journal.pcbi.1000522), 2009-10-02
Supplement: pcbi.1000522.s004.pdf [file pcbi.1000522.s004.pdf]

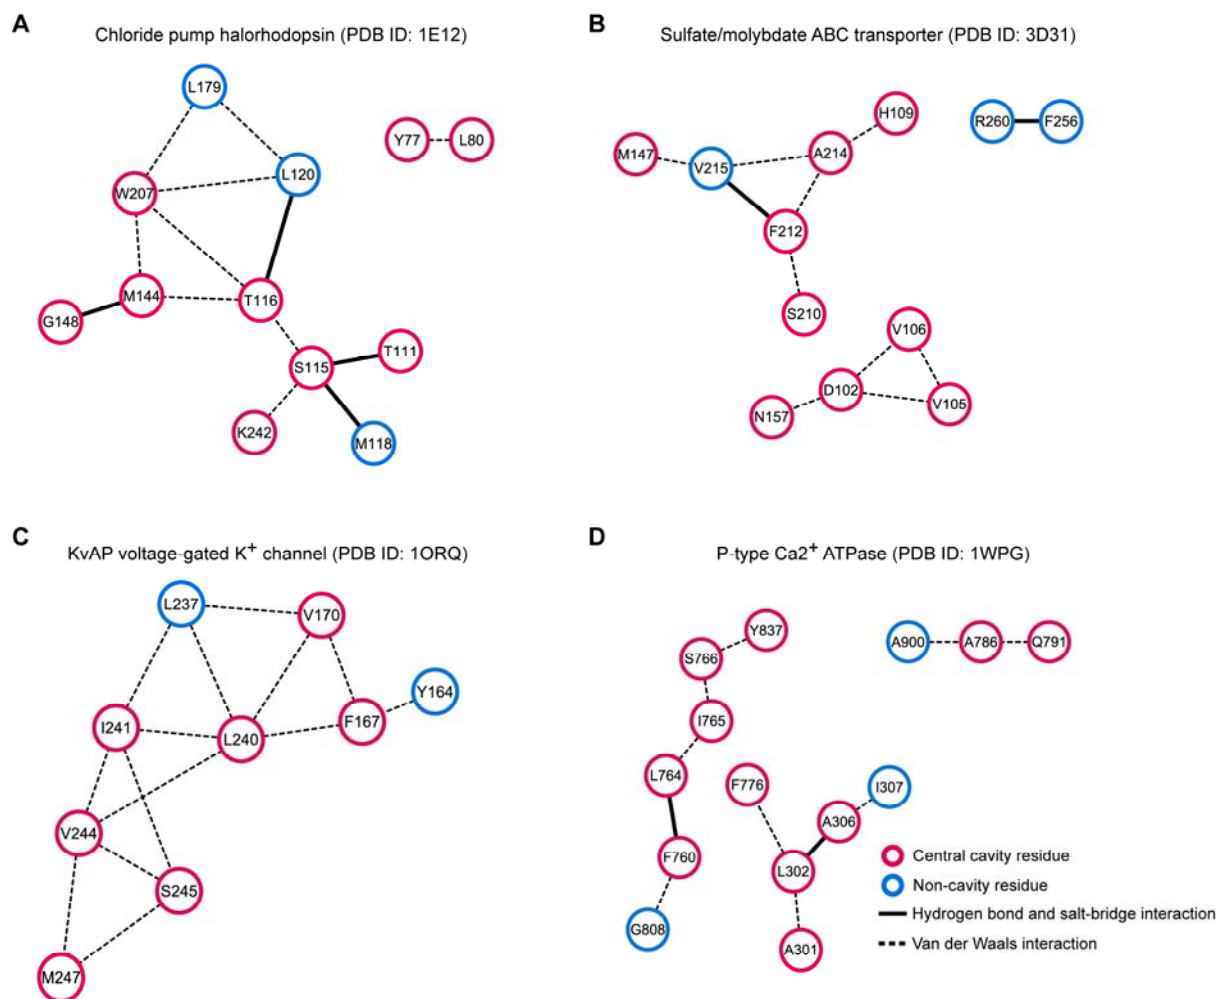

Figure S4. Interaction networks of the high-IS residues of membrane protein transporters. Red circle represents cavity residues and blue circle indicates non-cavity residues. (A) Chloride pump halorhodopsin (PDB ID: 1E12), (B) Sulfate/molybdate ABC transporter (PDB ID: 3D31), (C) KvAP voltage-gated K<sup>+</sup> channel (PDB ID: 1ORQ), and (D) P-type Ca<sup>2+</sup> ATPase (PDB ID: 1WPG).
