# Supplementary material for: Integration of Evolutionary Features for the Identification of Functionally Important Residues in Major Facilitator Superfamily Transporters
Source: PubMed Central journal article supplement (PMC2739438; doi:10.1371/journal.pcbi.1000522), 2009-10-02
Supplement: pcbi.1000522.s005.pdf [file pcbi.1000522.s005.pdf]

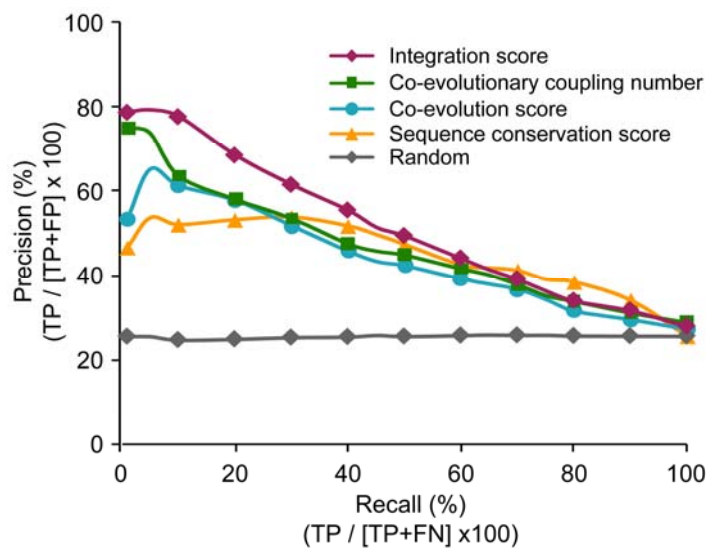

Figure S5. Precision-recall curves of four evolutionary approaches. Precision and recall were derived from cavity residues (positive set) and non-cavity residues (negative set) of 15 membrane protein transporters. Red, green, blue, and yellow dots represent the average precisions of each evolutionary approach in the given recall.
