# Supplementary material for: Integration of Evolutionary Features for the Identification of Functionally Important Residues in Major Facilitator Superfamily Transporters
Source: PubMed Central journal article supplement (PMC2739438; doi:10.1371/journal.pcbi.1000522), 2009-10-02
Supplement: pcbi.1000522.s007.pdf [file pcbi.1000522.s007.pdf]

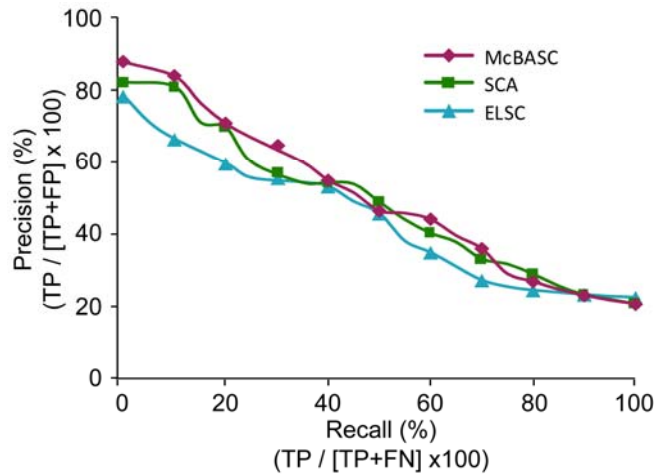

Figure S7. Precision-recall curves of three algorithms for co-evolutionary analysis. Precision-recall curves of McBASC, SCA, and ELSC algorithms were analyzed for the comparison of three different co-evolutionary methods. Red, green, and blue dots represent the average precisions of each algorithm in the given recall.
