# Supplementary material for: Integration of Evolutionary Features for the Identification of Functionally Important Residues in Major Facilitator Superfamily Transporters
Source: PLoS Comput Biol. 2009 Oct 2;5(10):e1000522. doi: 10.1371/journal.pcbi.1000522 (PMC2739438; doi:10.1371/journal.pcbi.1000522)
Supplement: Table S1 — Differences of IS, CN, and sequence conservation score between central cavity and non-cavity region. (0.10 MB XLS) [file pcbi.1000522.s009.xls]

## Sheet: Supplementary Table 1
Supplementary table 1. Differences of IS, CN, and sequence conservation score between central cavity and non-cavity region.
Evolutionary feature	Central cavity	Non-cavity	P-value (Central cavity vs. Non-cavity)
Evolutionary feature
IS	0.38693	0.124391	2.31x10-11
CN	0.468766	0.176944	2.21x10-9
Conservaiton score	0.765115	0.512574	1.16x10-9
Average IS, CN, and conservation score of central cavity and non-cavity region were shown.
