# Supplementary material for: Integration of Evolutionary Features for the Identification of Functionally Important Residues in Major Facilitator Superfamily Transporters
Source: PLoS Comput Biol. 2009 Oct 2;5(10):e1000522. doi: 10.1371/journal.pcbi.1000522 (PMC2739438; doi:10.1371/journal.pcbi.1000522)
Supplement: Table S3 — Interaction network of detected residues in LacY. (0.13 MB XLS) [file pcbi.1000522.s011.xls]

## Sheet: Supplementary Table 3
Supplementary table 3. Interaction network of detected residues in LacY
Position_A	Atom_A	Type of contacts	Position_B	Atom_B	Interatomic distance(Å)	Van der Waals surface (Å2)
241	N	Van der Waals interaction	240	C	1.3	56.4
262	N	Van der Waals interaction	261	C	1.3	56.4
242	N	Van der Waals interaction	241	C	1.3	56.6
351	N	Van der Waals interaction	350	C	1.3	58
350	O	Van der Waals interaction	351	N	2.2	0.3
240	O	Van der Waals interaction	241	N	2.3	0.3
241	O	Van der Waals interaction	242	N	2.3	0.3
261	O	Van der Waals interaction	262	N	2.3	0.3
351	CA	Van der Waals interaction	350	C	2.4	2.5
240	C	Van der Waals interaction	241	CA	2.4	2.9
262	CA	Van der Waals interaction	261	C	2.4	3.4
351	N	Van der Waals interaction	350	CA	2.4	4
262	N	Van der Waals interaction	261	CA	2.4	4.9
242	N	Van der Waals interaction	241	CA	2.4	5.9
126	OE2	Hydrogen-bond/salt-bridge	144	NE	2.4	29.1
242	CA	Van der Waals interaction	241	C	2.5	4.7
241	N	Van der Waals interaction	240	CA	2.5	4.8
240	OD1	Hydrogen-bond/salt-bridge	302	NH1	2.5	27.2
241	CB	Van der Waals interaction	242	N	2.6	6.7
144	NH2	Hydrogen-bond/salt-bridge	126	OE2	2.6	13.5
350	O	Van der Waals interaction	351	C	2.6	15.1
240	O	Van der Waals interaction	241	C	2.6	15.4
236	OH	Hydrogen-bond/salt-bridge	322	ND1	2.6	19.9
350	O	Van der Waals interaction	351	CA	2.7	0.5
241	CA	Van der Waals interaction	240	O	2.8	0.2
262	N	Van der Waals interaction	261	N	2.8	0.4
261	O	Van der Waals interaction	262	CA	2.8	2.3
240	C	Van der Waals interaction	241	C	2.8	2.7
241	N	Van der Waals interaction	240	N	2.8	5.1
241	O	Van der Waals interaction	240	O	2.8	5.7
241	NE2	Van der Waals interaction	366	CB	2.8	33.9
144	CZ	Van der Waals interaction	126	OE2	2.9	0.2
350	C	Van der Waals interaction	351	C	2.9	2.2
241	O	Van der Waals interaction	242	CA	2.9	5.5
262	C	Van der Waals interaction	261	O	2.9	6.1
302	NH1	Hydrogen-bond/salt-bridge	236	OH	2.9	17
242	N	Van der Waals interaction	241	N	3	1.4
351	N	Van der Waals interaction	350	N	3	2.4
262	N	Van der Waals interaction	261	CB	3	4.6
351	N	Van der Waals interaction	350	CB	3	5.1
351	O	Van der Waals interaction	350	O	3.1	1.9
236	O	Hydrogen-bond/salt-bridge	240	N	3.1	4.9
299	O	Van der Waals interaction	302	N	3.1	8.1
325	OE1	Van der Waals interaction	299	CE	3.1	28.9
240	O	Van der Waals interaction	242	N	3.2	0.5
276	CB	Van der Waals interaction	273	O	3.2	6.5
144	O	Hydrogen-bond/salt-bridge	147	N	3.2	8.5
242	C	Van der Waals interaction	241	C	3.3	2
236	CG	Van der Waals interaction	299	CG	3.3	2.9
236	OH	Van der Waals interaction	322	CB	3.3	5.5
322	CA	Van der Waals interaction	236	OH	3.3	8.7
302	CB	Van der Waals interaction	299	O	3.3	9.6
299	CG	Van der Waals interaction	325	OE1	3.3	11.9
299	CG	Van der Waals interaction	236	CD1	3.3	13.5
302	NH2	Van der Waals interaction	319	CA	3.3	23.6
241	N	Van der Waals interaction	240	CB	3.4	1
322	ND1	Van der Waals interaction	236	CZ	3.4	1.2
240	OD1	Van der Waals interaction	302	CZ	3.4	1.6
126	CD	Van der Waals interaction	144	NH2	3.4	5.8
236	CE2	Van der Waals interaction	322	ND1	3.4	13.5
322	O	Van der Waals interaction	325	OE2	3.4	15.1
322	CB	Van der Waals interaction	302	CZ	3.4	16.6
242	C	Van der Waals interaction	241	O	3.5	0.4
126	CD	Van der Waals interaction	144	NE	3.5	0.9
366	OG	Van der Waals interaction	241	NE2	3.5	1.6
302	NH1	Van der Waals interaction	322	CB	3.5	1.8
240	CG	Van der Waals interaction	302	NH1	3.5	3.6
236	CE2	Van der Waals interaction	325	OE1	3.5	10.8
261	CE1	Van der Waals interaction	319	CE	3.5	15.3
299	SD	Van der Waals interaction	325	OE1	3.6	1.6
236	CZ	Van der Waals interaction	302	NH1	3.6	4
302	NH2	Van der Waals interaction	322	CB	3.6	6.7
322	CE1	Van der Waals interaction	236	OH	3.7	0.4
299	CG	Van der Waals interaction	236	CE1	3.7	0.7
302	NH2	Hydrogen-bond/salt-bridge	240	OD1	3.7	3.4
236	CD1	Van der Waals interaction	299	CB	3.7	3.4
144	CG	Van der Waals interaction	126	OE2	3.7	3.4
126	OE1	Hydrogen-bond/salt-bridge	144	NH2	3.7	4.3
84	O	Van der Waals interaction	174	OG	3.7	4.9
302	CD	Van der Waals interaction	236	OH	3.7	8.3
236	CD2	Van der Waals interaction	325	OE1	3.7	8.7
236	CE1	Van der Waals interaction	299	CA	3.7	14.6
299	CE	Van der Waals interaction	236	CB	3.7	16.8
236	CD2	Van der Waals interaction	299	CG	3.8	0.2
262	N	Van der Waals interaction	261	CG	3.8	0.2
147	N	Van der Waals interaction	144	C	3.8	0.6
236	CD1	Van der Waals interaction	299	CA	3.8	0.9
322	ND1	Van der Waals interaction	302	NH1	3.8	1.2
236	CB	Van der Waals interaction	299	CG	3.8	1.6
240	OD2	Hydrogen-bond/salt-bridge	302	NH1	3.8	2.9
236	CD2	Van der Waals interaction	299	CE	3.8	3.1
322	CG	Van der Waals interaction	302	NH1	3.8	3.8
319	CG	Van der Waals interaction	302	NH2	3.8	7.6
327	CB	Van der Waals interaction	276	SD	3.8	10.5
276	CE	Van der Waals interaction	327	CA	3.8	12.8
319	CG	Van der Waals interaction	261	CE1	3.8	13.2
322	CE1	Van der Waals interaction	236	CE2	3.8	13.5
144	CZ	Van der Waals interaction	126	CD	3.9	0.4
327	CG	Van der Waals interaction	276	CE	3.9	1.8
147	CA	Van der Waals interaction	144	O	3.9	2.5
147	C	Van der Waals interaction	144	O	3.9	3.4
236	CE1	Van der Waals interaction	299	O	3.9	3.4
325	CB	Van der Waals interaction	322	O	3.9	5.4
322	CB	Van der Waals interaction	319	O	3.9	7
236	CE1	Van der Waals interaction	302	NH1	3.9	7.4
276	CB	Van der Waals interaction	273	C	4	0.2
319	CB	Van der Waals interaction	302	NH2	4	0.2
302	NE	Van der Waals interaction	322	CB	4	0.2
240	O	Van der Waals interaction	242	C	4	0.2
242	O	Van der Waals interaction	241	O	4	0.5
319	CD	Van der Waals interaction	261	CE1	4	1.3
325	CD	Van der Waals interaction	299	CG	4	1.8
84	O	Van der Waals interaction	174	CA	4	2.8
261	CD1	Van der Waals interaction	319	CE	4	3.6
236	CD1	Van der Waals interaction	299	O	4	3.8
325	CG	Van der Waals interaction	299	CG	4	4
325	CD	Van der Waals interaction	236	CE2	4	7
261	CZ	Van der Waals interaction	319	CE	4	7.4
319	C	Van der Waals interaction	302	NH2	4.1	0.7
261	CD2	Van der Waals interaction	262	N	4.1	1.3
236	CZ	Van der Waals interaction	299	CG	4.1	2.7
236	CE1	Van der Waals interaction	302	CD	4.1	4
241	CB	Van der Waals interaction	242	OE1	4.1	7
322	CG	Van der Waals interaction	302	CZ	4.2	0.2
322	N	Van der Waals interaction	302	NE	4.2	0.6
322	C	Van der Waals interaction	325	N	4.2	0.7
302	CB	Van der Waals interaction	299	C	4.2	0.7
327	CG	Van der Waals interaction	276	SD	4.2	0.7
325	OE2	Van der Waals interaction	236	CE2	4.2	0.7
302	NH2	Van der Waals interaction	322	CG	4.2	1.2
236	CZ	Van der Waals interaction	325	OE1	4.2	1.3
261	CD1	Van der Waals interaction	319	CG	4.2	1.8
299	C	Van der Waals interaction	236	CD1	4.2	2.2
325	OE2	Hydrogen-bond/salt-bridge	322	ND1	4.2	2.6
240	OD2	Van der Waals interaction	322	NE2	4.2	2.6
240	CB	Van der Waals interaction	236	O	4.2	3.1
240	OD2	Van der Waals interaction	322	CE1	4.2	11.1
240	OD1	Van der Waals interaction	236	OH	4.3	0.2
319	C	Van der Waals interaction	322	N	4.3	0.7
325	CB	Van der Waals interaction	322	C	4.3	0.7
241	C	Van der Waals interaction	242	OE1	4.3	0.9
273	CA	Van der Waals interaction	276	CB	4.3	2.5
240	OD2	Van der Waals interaction	302	NH2	4.3	3.1
240	CG	Van der Waals interaction	302	CZ	4.4	0.4
240	OD2	Van der Waals interaction	322	CG	4.4	0.5
241	CB	Van der Waals interaction	242	CB	4.4	0.7
236	CZ	Van der Waals interaction	240	OD1	4.4	0.7
236	CZ	Van der Waals interaction	325	CD	4.4	0.7
240	CG	Van der Waals interaction	302	NH2	4.4	1.1
319	NZ	Van der Waals interaction	261	CE1	4.4	1.8
322	CD2	Van der Waals interaction	240	OD2	4.4	2.9
302	CD	Van der Waals interaction	322	N	4.4	3.4
319	NZ	Van der Waals interaction	322	CD2	4.4	9.3
276	CE	Van der Waals interaction	327	N	4.5	0.2
236	CE2	Van der Waals interaction	302	NH1	4.5	0.2
236	OH	Van der Waals interaction	325	OE2	4.5	0.2
299	SD	Van der Waals interaction	325	CG	4.5	0.2
299	CA	Van der Waals interaction	236	CZ	4.5	0.7
299	CB	Van der Waals interaction	236	CB	4.5	0.9
319	NZ	Van der Waals interaction	261	CZ	4.5	2.4
236	OH	Van der Waals interaction	325	CD	4.6	0.2
302	CB	Van der Waals interaction	236	CE1	4.6	0.7
241	CG	Van der Waals interaction	366	CB	4.6	0.7
299	N	Van der Waals interaction	325	CG	4.6	1.4
242	CD	Van der Waals interaction	241	CB	4.6	2
322	CA	Van der Waals interaction	325	CB	4.6	2.5
240	CG	Van der Waals interaction	322	ND1	4.6	4
299	CA	Van der Waals interaction	302	CB	4.7	1.1
240	CG	Van der Waals interaction	322	CE1	4.7	1.8
319	NZ	Van der Waals interaction	302	NH2	4.7	2.8
327	CB	Van der Waals interaction	276	N	4.8	0.2
241	NE2	Van der Waals interaction	366	O	4.8	0.2
325	CB	Van der Waals interaction	299	N	4.8	1.1
236	CE2	Van der Waals interaction	240	OD1	4.8	1.8
240	CG	Van der Waals interaction	236	O	4.9	0.2
240	CG	Van der Waals interaction	236	OH	4.9	0.4
299	CA	Van der Waals interaction	325	CG	4.9	0.9
240	CG	Van der Waals interaction	236	CZ	5	1.1
236	CE2	Van der Waals interaction	240	CG	5	1.3
325	CB	Van der Waals interaction	236	OH	5.1	1.1
319	NZ	Van der Waals interaction	240	OD2	5.1	4
299	CA	Van der Waals interaction	325	CB	5.3	0.4
241	CG	Van der Waals interaction	366	CA	5.4	0.2
240	CB	Van der Waals interaction	236	CE2	5.4	1.3
322	CE1	Van der Waals interaction	240	CB	5.5	0.4
241	CG	Van der Waals interaction	242	CD	5.5	0.4
366	O	Van der Waals interaction	242	NE2	5.5	0.5
240	CB	Van der Waals interaction	236	CD2	5.7	0.2
236	CD2	Van der Waals interaction	240	CG	5.7	0.2
147	C	Van der Waals interaction	144	CD	5.9	0.4
147	CA	Van der Waals interaction	144	CD	6	0.2
144	CG	Van der Waals interaction	276	CE	6.6	0.2
