# Supplementary material for: Integration of Evolutionary Features for the Identification of Functionally Important Residues in Major Facilitator Superfamily Transporters
Source: PLoS Comput Biol. 2009 Oct 2;5(10):e1000522. doi: 10.1371/journal.pcbi.1000522 (PMC2739438; doi:10.1371/journal.pcbi.1000522)
Supplement: Table S4 — List of central cavity residues in glycerol-3-phosphate transporter (GlpT). (0.14 MB XLS) [file pcbi.1000522.s012.xls]

## Sheet: Supplementary Table 4
Supplementary table 4. List of central cavity residues in glycerol-3-phosphate transporter (GlpT).
SA (Solvent Accessibility) indicates that the relative accessibilities to the surface in protein structure with 1.2A probe.
TM indicates transmembrane helix.
TM	Residue	Position	SA*	Central cavity
-	PHE	5	226.31	-
-	LYS	6	124.92	-
-	PRO	7	72.26	-
-	ALA	8	60.66	-
-	PRO	9	100.82	-
-	HIS	10	144.01	-
-	LYS	11	151.28	-
-	ALA	12	72.66	-
-	ARG	13	159.31	-
-	LEU	14	130.45	-
-	PRO	15	45	-
-	ALA	16	67.23	-
-	ALA	17	94.13	-
-	GLU	18	127.32	-
-	ILE	19	24.83	-
-	ASP	20	66.37	-
-	PRO	21	50.64	-
-	THR	22	70.56	-
-	TYR	23	18.08	-
-	ARG	24	149.6	-
-	ARG	25	181.92	-
-	LEU	26	34.09	-
-	ARG	27	56.82	-
-	TRP	28	185.97	-
-	GLN	29	51.16	-
1	ILE	30	11.52	-
1	PHE	31	77.02	-
1	LEU	32	61.08	-
1	GLY	33	0.09	-
1	ILE	34	10.99	-
1	PHE	35	31.47	0
1	PHE	36	89.35	-
1	GLY	37	0.93	-
1	TYR	38	28.36	0
1	ALA	39	9.65	-
1	ALA	40	3.25	-
1	TYR	41	6.26	-
1	TYR	42	22.32	0
1	LEU	43	16.07	-
1	VAL	44	6.02	-
1	ARG	45	20.36	0
1	LYS	46	42.32	0
1	ASN	47	5.22	-
1	PHE	48	9.21	-
1	ALA	49	0.67	-
1	LEU	50	6.67	0
1	ALA	51	4.28	-
1	MET	52	15.76	-
-	PRO	53	31.88	-
-	TYR	54	37.66	-
-	LEU	55	11.42	-
-	VAL	56	21.84	-
-	GLU	57	136.88	-
-	GLN	58	105.07	-
-	GLY	59	75.81	-
-	PHE	60	47.05	-
-	SER	61	46.99	-
-	ARG	62	140.71	-
-	GLY	63	18.5	-
2	ASP	64	10.95	-
2	LEU	65	8.68	-
2	GLY	66	4.77	-
2	PHE	67	90.11	-
2	ALA	68	2.94	-
2	LEU	69	9.14	0
2	SER	70	9.61	-
2	GLY	71	0	-
2	ILE	72	11.91	-
2	SER	73	16.29	0
2	ILE	74	48.92	-
2	ALA	75	0	-
2	TYR	76	60.22	0
2	GLY	77	22.34	0
2	PHE	78	123.19	-
2	SER	79	3.17	-
2	LYS	80	132.54	0
2	PHE	81	165.93	-
2	ILE	82	91.1	-
2	MET	83	26.68	-
2	GLY	84	46.19	-
-	SER	85	65.93	-
-	VAL	86	52.29	-
-	SER	87	5.43	-
-	ASP	88	85.15	-
-	ARG	89	196.66	-
-	SER	90	14.17	-
3	ASN	91	28.59	-
3	PRO	92	6.71	-
3	ARG	93	65.65	-
3	VAL	94	51.31	-
3	PHE	95	27.36	-
3	LEU	96	4.24	-
3	PRO	97	7.36	-
3	ALA	98	47.33	-
3	GLY	99	0	-
3	LEU	100	3.86	-
3	ILE	101	56.74	-
3	LEU	102	78.2	-
3	ALA	103	4.13	-
3	ALA	104	0.53	-
3	ALA	105	44.68	-
3	VAL	106	23.62	-
3	MET	107	9.9	-
3	LEU	108	43.04	-
3	PHE	109	88.74	-
3	MET	110	7.33	-
3	GLY	111	8.22	-
-	PHE	112	101.77	-
-	VAL	113	62.08	-
-	PRO	114	94.57	-
-	TRP	115	165.62	-
-	ALA	116	0.68	-
-	THR	117	15.23	-
-	SER	118	48.14	-
-	SER	119	49.35	-
-	ILE	120	83.47	-
-	ALA	121	34.7	-
4	VAL	122	28.27	-
4	MET	123	1.53	-
4	PHE	124	52.44	-
4	VAL	125	81.87	-
4	LEU	126	30.45	-
4	LEU	127	3	0
4	PHE	128	60.13	-
4	LEU	129	84.53	-
4	CYS	130	1.35	-
4	GLY	131	0.08	-
4	TRP	132	72.94	-
4	PHE	133	35.19	-
4	GLN	134	5.68	0
4	GLY	135	8.12	-
4	MET	136	23.55	-
4	GLY	137	0.52	0
4	TRP	138	109.78	0
4	PRO	139	28.9	0
4	PRO	140	1.49	-
4	CYS	141	7.92	-
-	GLY	142	18.93	-
-	ARG	143	73.59	-
-	THR	144	7.79	-
-	MET	145	21.68	-
-	VAL	146	88.36	-
-	HIS	147	74.75	-
-	TRP	148	73.39	-
-	TRP	149	81.68	-
-	SER	150	44.6	-
-	GLN	151	91.33	-
-	LYS	152	71	-
-	GLU	153	54.8	-
-	ARG	154	168.14	-
-	GLY	155	40.48	-
-	GLY	156	32.09	-
-	ILE	157	49.93	-
-	VAL	158	95.7	-
-	SER	159	43.58	-
5	VAL	160	20.05	-
5	TRP	161	172.94	0
5	ASN	162	45.37	0
5	CYS	163	37.21	-
5	ALA	164	2.98	-
5	HIS	165	49.63	0
5	ASN	166	9.92	0
5	VAL	167	38.12	-
5	GLY	168	6.76	-
5	GLY	169	7.31	0
5	GLY	170	0	-
5	ILE	171	62.7	-
5	PRO	172	4.32	-
5	PRO	173	2.23	-
5	LEU	174	48.3	-
5	LEU	175	44.22	-
5	PHE	176	5.48	-
5	LEU	177	44.65	-
5	LEU	178	79.68	-
5	GLY	179	0.76	-
-	MET	180	48.97	-
-	ALA	181	83.99	-
-	TRP	182	157.82	-
-	PHE	183	99.08	-
-	ASN	184	119.3	-
-	ASP	185	61.1	-
-	TRP	186	159.18	-
-	HIS	187	51.17	-
-	ALA	188	7.88	-
-	ALA	189	1.17	-
6	LEU	190	14.56	-
6	TYR	191	16.08	-
6	MET	192	34.11	-
6	PRO	193	3.28	-
6	ALA	194	1.52	-
6	PHE	195	117.88	-
6	CYS	196	45.96	-
6	ALA	197	0	-
6	ILE	198	45.17	-
6	LEU	199	105.17	-
6	VAL	200	38.78	-
6	ALA	201	0.2	-
6	LEU	202	97.2	-
6	PHE	203	79.91	-
6	ALA	204	0.34	-
6	PHE	205	81.41	-
6	ALA	206	59.01	-
6	MET	207	64.86	-
6	MET	208	0.86	-
-	ARG	209	69.47	-
-	ASP	210	34.28	-
-	THR	211	16.86	-
-	PRO	212	61.46	-
-	GLN	213	31.53	-
-	SER	214	55.37	-
-	CYS	215	4.31	-
-	GLY	216	29.13	-
-	LEU	217	37.27	-
-	PRO	218	88.96	-
-	PRO	219	57.23	-
-	ILE	220	69.82	-
-	GLU	221	74.81	-
-	GLU	222	123.27	-
-	TYR	223	141.27	-
-	LYS	224	89.31	-
-	ASN	225	83.37	-
-	ASP	226	163.53	-
-	THR	240	133.66	-
-	ALA	241	55.79	-
-	LYS	242	153.79	-
-	GLN	243	81.92	-
-	ILE	244	26.92	-
-	PHE	245	58.27	-
-	MET	246	108.28	-
-	GLN	247	115.76	-
-	TYR	248	105.29	-
-	VAL	249	4.83	-
-	LEU	250	71.66	-
-	PRO	251	81.16	-
-	ASN	252	29.51	-
-	LYS	253	154.61	-
-	LEU	254	27.04	-
-	LEU	255	2.62	-
-	TRP	256	86.02	-
7	TYR	257	89.42	-
7	ILE	258	0.66	-
7	ALA	259	0.39	-
7	ILE	260	70.42	-
7	ALA	261	2.02	-
7	ASN	262	4.64	-
7	VAL	263	23.85	-
7	PHE	264	52.58	-
7	VAL	265	3.98	0
7	TYR	266	25.15	0
7	LEU	267	7.61	-
7	LEU	268	3.36	-
7	ARG	269	20.04	0
7	TYR	270	15.47	0
7	GLY	271	1.58	0
7	ILE	272	23.29	-
7	LEU	273	9.45	0
7	ASP	274	10.46	0
7	TRP	275	29.99	0
7	SER	276	9.68	-
7	PRO	277	12.02	0
7	THR	278	25.2	-
7	TYR	279	31.93	-
7	LEU	280	25.9	0
-	LYS	281	130.38	-
-	GLU	282	105.72	-
-	VAL	283	84.17	-
-	LYS	284	21.79	-
-	HIS	285	122.14	-
-	PHE	286	152.08	-
-	ALA	287	51.22	-
-	LEU	288	45.35	-
-	ASP	289	79.41	-
-	LYS	290	109.42	-
8	SER	291	15.19	0
8	SER	292	4.06	-
8	TRP	293	123.93	-
8	ALA	294	4.3	-
8	TYR	295	14.06	0
8	PHE	296	39.67	-
8	LEU	297	56.84	-
8	TYR	298	6.09	0
8	GLU	299	12.81	0
8	TYR	300	58.28	-
8	ALA	301	20.13	-
8	GLY	302	8.84	0
8	ILE	303	53.61	0
8	PRO	304	71.66	-
8	GLY	305	0.58	-
8	THR	306	14.36	0
8	LEU	307	131.02	-
8	LEU	308	55.85	-
8	CYS	309	1.38	-
8	GLY	310	21.6	-
-	TRP	311	147.45	-
-	MET	312	54.17	-
-	SER	313	8.4	-
-	ASP	314	102.7	-
-	LYS	315	126.91	-
-	VAL	316	82.88	-
-	PHE	317	63.06	-
-	ARG	318	210.26	-
-	GLY	319	41.39	-
-	ASN	320	57.54	-
-	ARG	321	74.96	-
-	GLY	322	2.34	-
9	ALA	323	19.83	-
9	THR	324	1.28	-
9	GLY	325	1.78	-
9	VAL	326	37.22	-
9	PHE	327	78.64	-
9	PHE	328	8.06	-
9	MET	329	5.76	-
9	THR	330	73.37	-
9	LEU	331	77	-
9	VAL	332	3.16	-
9	THR	333	34.2	-
9	ILE	334	104.86	-
9	ALA	335	7.36	-
9	THR	336	3.8	-
9	ILE	337	57.9	-
9	VAL	338	53.12	-
9	TYR	339	31.49	-
9	TRP	340	57.31	-
9	MET	341	132.64	-
9	ASN	342	37.86	-
-	PRO	343	89.17	-
-	ALA	344	85.54	-
-	GLY	345	44.07	-
-	ASN	346	8.3	-
10	PRO	347	58.27	-
10	THR	348	117	-
10	VAL	349	39.54	-
10	ASP	350	13.91	-
10	MET	351	60.57	-
10	ILE	352	86.42	-
10	CYS	353	6.47	-
10	MET	354	18.9	0
10	ILE	355	58.72	-
10	VAL	356	48.9	-
10	ILE	357	1.95	-
10	GLY	358	6.4	-
10	PHE	359	71.43	-
10	LEU	360	16.1	-
10	ILE	361	7.95	0
10	TYR	362	43.53	0
10	GLY	363	3.36	-
10	PRO	364	2.75	0
10	VAL	365	21.93	-
10	MET	366	54.62	0
10	LEU	367	6.19	-
10	ILE	368	7.4	-
10	GLY	369	18.78	0
-	LEU	370	56.99	-
-	HIS	371	10.48	-
-	ALA	372	0	-
-	LEU	373	77.54	-
-	GLU	374	100.67	-
-	LEU	375	9.21	-
-	ALA	376	16.68	-
-	PRO	377	66.75	-
-	LYS	378	186.59	-
-	LYS	379	121.63	-
-	ALA	380	3.7	-
-	ALA	381	16.24	-
-	GLY	382	51.52	-
-	THR	383	71.73	-
-	ALA	384	0	-
-	ALA	385	25.64	-
-	GLY	386	40.36	-
11	PHE	387	35.2	-
11	THR	388	2.23	-
11	GLY	389	32.74	0
11	LEU	390	91.74	0
11	PHE	391	86.76	-
11	GLY	392	0.02	-
11	TYR	393	47.33	0
11	LEU	394	73.97	0
11	GLY	395	24.56	-
11	GLY	396	0.22	-
11	SER	397	9.1	0
11	VAL	398	55.65	0
11	ALA	399	18.49	-
11	ALA	400	1.12	0
11	SER	401	10.17	0
11	ALA	402	15.17	-
11	ILE	403	87.7	-
11	VAL	404	7.39	0
11	GLY	405	6.98	-
11	TYR	406	101.67	-
11	THR	407	32.17	-
11	VAL	408	33.02	-
-	ASP	409	73.23	-
-	PHE	410	187.43	-
-	PHE	411	138.84	-
-	GLY	412	43.6	-
-	TRP	413	65.33	-
12	ASP	414	79.54	-
12	GLY	415	12.19	-
12	GLY	416	3.39	-
12	PHE	417	20.88	-
12	MET	418	107.79	-
12	VAL	419	60.85	-
12	MET	420	9.76	-
12	ILE	421	24.27	-
12	GLY	422	19.18	-
12	GLY	423	6.18	-
12	SER	424	4.65	-
12	ILE	425	82.61	-
12	LEU	426	79.14	-
12	ALA	427	3.99	-
12	VAL	428	37.16	-
12	ILE	429	96.59	-
12	LEU	430	30.53	-
12	LEU	431	12.59	-
12	ILE	432	75.67	-
12	VAL	433	59.8	-
-	VAL	434	2.69	-
-	MET	435	54.74	-
-	ILE	436	92.9	-
-	GLY	437	22.06	-
-	GLU	438	48.61	-
-	LYS	439	135.51	-
-	ARG	440	153.96	-
-	ARG	441	114.97	-
-	HIS	442	131.28	-
-	GLU	443	115.75	-
-	GLN	444	96.97	-
-	LEU	445	118.21	-
-	LEU	446	126.91	-
-	GLN	447	103.43	-
-	GLU	448	123.93	-
-	LEU	449	146.53	-
-	VAL	450	100.92	-
-	PRO	451	154.44	-
