# Supplementary material for: Integration of Evolutionary Features for the Identification of Functionally Important Residues in Major Facilitator Superfamily Transporters
Source: PLoS Comput Biol. 2009 Oct 2;5(10):e1000522. doi: 10.1371/journal.pcbi.1000522 (PMC2739438; doi:10.1371/journal.pcbi.1000522)
Supplement: Table S5 — Interaction network of detected residues in GlpT. (0.13 MB XLS) [file pcbi.1000522.s013.xls]

## Sheet: Supplementary Table 5
Supplementary table 5. Interaction network of detected residues in GlpT
Position_A	Atom_A	Type of contacts	Position_B	Atom_B	Interatomic distance(Å)	Van der Waals surface (Å2)
80	N	Van der Waals interaction	79	C	1.3	56.2
81	N	Van der Waals interaction	80	C	1.3	57
139	N	Van der Waals interaction	138	C	1.3	56.2
162	N	Van der Waals interaction	161	C	1.3	56.6
169	N	Van der Waals interaction	168	C	1.3	56.2
362	N	Van der Waals interaction	361	C	1.3	57.2
79	O	Van der Waals interaction	80	N	2.2	0.9
80	O	Van der Waals interaction	81	N	2.2	0.3
138	O	Van der Waals interaction	139	N	2.2	0.7
361	O	Van der Waals interaction	362	N	2.2	0.3
161	O	Van der Waals interaction	162	N	2.3	0.5
168	O	Van der Waals interaction	169	N	2.3	0.5
80	CA	Van der Waals interaction	79	C	2.4	3.4
81	CA	Van der Waals interaction	80	C	2.4	2.9
139	CA	Van der Waals interaction	138	C	2.4	4.7
169	CA	Van der Waals interaction	168	C	2.4	5.4
362	CA	Van der Waals interaction	361	C	2.4	6.1
80	N	Van der Waals interaction	79	CA	2.4	4.9
81	N	Van der Waals interaction	80	CA	2.4	4.9
162	N	Van der Waals interaction	161	CA	2.4	5.1
169	N	Van der Waals interaction	168	CA	2.4	5.1
362	N	Van der Waals interaction	361	CA	2.4	4.6
299	OE2	Van der Waals interaction	165	CE1	2.4	29.3
162	CA	Van der Waals interaction	161	C	2.5	4.7
80	N	Van der Waals interaction	79	OG	2.5	5.3
139	CD	Van der Waals interaction	138	C	2.6	6.5
138	O	Van der Waals interaction	139	CA	2.6	8
81	N	Van der Waals interaction	80	N	2.7	5.7
79	O	Van der Waals interaction	80	CA	2.7	6.9
80	O	Van der Waals interaction	81	CA	2.7	7.3
361	O	Van der Waals interaction	362	CA	2.7	6.8
389	O	Van der Waals interaction	393	N	2.7	28.9
79	CB	Van der Waals interaction	80	N	2.8	1.8
362	N	Van der Waals interaction	361	N	2.8	2.2
79	O	Van der Waals interaction	80	C	2.8	6.4
80	O	Van der Waals interaction	81	C	2.8	6.8
161	O	Van der Waals interaction	162	CA	2.8	5.9
168	O	Van der Waals interaction	169	CA	2.8	6.9
79	C	Van der Waals interaction	81	N	2.9	4.7
80	C	Van der Waals interaction	81	C	2.9	0.4
139	C	Van der Waals interaction	138	O	2.9	1.6
161	CB	Van der Waals interaction	162	N	2.9	4.3
169	N	Van der Waals interaction	168	N	2.9	3.8
79	O	Van der Waals interaction	81	N	2.9	1.9
165	ND1	Hydrogen-bond/salt-bridge	299	OE2	3	2.2
77	C	Van der Waals interaction	79	N	3	4
138	N	Van der Waals interaction	139	N	3	0.6
162	N	Van der Waals interaction	161	N	3	3
362	O	Hydrogen-bond/salt-bridge	366	N	3.1	9.2
138	C	Van der Waals interaction	139	C	3.1	2.2
168	C	Van der Waals interaction	169	C	3.1	2.7
169	C	Van der Waals interaction	168	O	3.1	4.7
362	C	Van der Waals interaction	361	C	3.1	2.7
138	CB	Van der Waals interaction	139	N	3.1	0.9
139	CD	Van der Waals interaction	138	CA	3.1	5.2
80	N	Van der Waals interaction	79	N	3.1	2
138	N	Van der Waals interaction	139	CD	3.1	1.8
362	N	Van der Waals interaction	361	CB	3.1	1.6
269	NH1	Van der Waals interaction	362	CD1	3.1	24
77	O	Van der Waals interaction	79	N	3.1	0.9
165	NE2	Hydrogen-bond/salt-bridge	299	OE2	3.2	2
362	C	Van der Waals interaction	364	N	3.2	0.9
266	CD1	Van der Waals interaction	393	N	3.2	17.7
389	O	Van der Waals interaction	393	CB	3.2	8.3
165	O	Hydrogen-bond/salt-bridge	169	N	3.3	10.7
161	C	Van der Waals interaction	162	C	3.3	0.2
162	C	Van der Waals interaction	161	O	3.3	4.5
135	CA	Van der Waals interaction	79	OG	3.3	24
361	CD1	Van der Waals interaction	269	CG	3.3	14.6
362	CE2	Van der Waals interaction	162	OD1	3.3	19.5
361	CG2	Van der Waals interaction	269	CB	3.3	18.4
81	N	Van der Waals interaction	80	CB	3.3	1
361	O	Van der Waals interaction	362	C	3.3	2.6
393	CA	Van der Waals interaction	266	CD1	3.4	6.7
299	CD	Van der Waals interaction	165	CE1	3.4	7
362	CE1	Van der Waals interaction	269	NH1	3.4	10.5
135	O	Van der Waals interaction	139	CD	3.4	14.9
362	OH	Van der Waals interaction	162	OD1	3.4	8.7
80	CA	Van der Waals interaction	79	OG	3.5	2.5
139	CD	Van der Waals interaction	138	CB	3.5	4.5
266	CE1	Van der Waals interaction	393	N	3.5	12.6
138	CE3	Van der Waals interaction	139	N	3.5	11
269	CA	Van der Waals interaction	361	CG2	3.6	5.8
361	CD1	Van der Waals interaction	269	CB	3.6	0.7
266	CE1	Van der Waals interaction	393	CA	3.6	3.1
169	O	Van der Waals interaction	299	OE1	3.6	8
161	O	Hydrogen-bond/salt-bridge	165	N	3.7	13.7
139	CA	Van der Waals interaction	138	CE3	3.7	7.2
269	CA	Van der Waals interaction	361	CD1	3.7	3.8
269	CB	Van der Waals interaction	266	O	3.7	6.1
364	CD	Van der Waals interaction	362	C	3.7	0.2
266	C	Van der Waals interaction	269	N	3.8	0.2
169	CA	Van der Waals interaction	165	O	3.8	9
161	CB	Van der Waals interaction	162	OD1	3.8	9.9
393	CB	Van der Waals interaction	266	CE1	3.8	2.7
139	CD	Van der Waals interaction	138	CE3	3.8	4.9
364	CD	Van der Waals interaction	361	O	3.8	0.2
266	CE2	Van der Waals interaction	269	NH1	3.8	21.3
361	CG2	Van der Waals interaction	269	N	3.8	4
269	CZ	Van der Waals interaction	362	CD1	3.8	3.4
138	N	Van der Waals interaction	135	O	3.8	1.8
361	O	Van der Waals interaction	364	CG	3.8	8.3
161	C	Van der Waals interaction	162	OD1	3.9	0.2
169	C	Van der Waals interaction	299	OE1	3.9	6.3
266	CB	Van der Waals interaction	396	CA	3.9	12.1
393	CD1	Van der Waals interaction	266	CZ	3.9	17.7
362	CE2	Van der Waals interaction	162	CG	3.9	2.5
269	NH2	Van der Waals interaction	362	CD1	3.9	7.7
77	O	Van der Waals interaction	80	N	3.9	4.5
299	OE2	Van der Waals interaction	165	CG	3.9	0.5
162	CA	Van der Waals interaction	362	CE2	4	6.3
396	CA	Van der Waals interaction	393	O	4	0.2
162	CB	Van der Waals interaction	362	CE2	4	5.6
361	CB	Van der Waals interaction	269	CB	4	2.2
366	CB	Van der Waals interaction	362	O	4	4
165	CD2	Van der Waals interaction	299	OE2	4	0.7
139	CG	Van der Waals interaction	135	O	4	3.4
362	N	Van der Waals interaction	361	CG1	4	1
79	CB	Van der Waals interaction	135	CA	4.1	6.3
135	C	Van der Waals interaction	79	OG	4.1	2.5
139	CB	Van der Waals interaction	138	CE3	4.1	6.1
162	CG	Van der Waals interaction	161	CB	4.1	1.1
165	CE1	Van der Waals interaction	299	OE1	4.1	0.9
165	CE1	Van der Waals interaction	169	CA	4.1	10.1
266	C	Van der Waals interaction	396	O	4.1	2.2
266	OH	Van der Waals interaction	393	CD1	4.1	4.7
266	CE1	Van der Waals interaction	389	O	4.1	4.9
266	O	Van der Waals interaction	396	O	4.1	0.5
299	CD	Van der Waals interaction	169	C	4.1	3.6
361	CB	Van der Waals interaction	269	CG	4.1	1.1
361	C	Van der Waals interaction	364	CD	4.1	1.3
362	OH	Van der Waals interaction	161	O	4.1	9.9
138	CZ3	Van der Waals interaction	139	CA	4.2	5.8
161	C	Van der Waals interaction	362	OH	4.2	2.2
266	CG	Van der Waals interaction	393	CA	4.2	1.8
266	CE2	Van der Waals interaction	393	CD1	4.2	5.6
266	CD2	Van der Waals interaction	269	CD	4.2	11.2
269	NH2	Van der Waals interaction	165	CD2	4.2	13.1
77	O	Van der Waals interaction	81	CD1	4.3	7.6
80	CB	Van der Waals interaction	79	OG	4.3	1.1
165	ND1	Van der Waals interaction	169	CA	4.3	0.2
165	CG	Van der Waals interaction	269	NH2	4.3	2.5
266	CE2	Van der Waals interaction	269	CD	4.3	0.4
269	CB	Van der Waals interaction	266	C	4.3	0.9
269	CD	Van der Waals interaction	361	CD1	4.3	1.1
299	OE2	Van der Waals interaction	269	NH2	4.3	5
362	CE1	Van der Waals interaction	269	CZ	4.3	0.4
389	C	Van der Waals interaction	393	CB	4.3	0.4
77	O	Hydrogen-bond/salt-bridge	81	N	4.4	1.6
81	CG	Van der Waals interaction	77	O	4.4	0.9
135	O	Van der Waals interaction	79	OG	4.4	0.5
138	CZ3	Van der Waals interaction	139	CB	4.4	3.4
266	CA	Van der Waals interaction	269	CB	4.4	1.1
362	CE1	Van der Waals interaction	269	NH2	4.4	1.6
362	CZ	Van der Waals interaction	162	CA	4.4	2.2
364	CG	Van der Waals interaction	361	C	4.4	0.7
80	C	Van der Waals interaction	81	CD2	4.5	0.7
81	CE1	Van der Waals interaction	77	O	4.5	4.5
165	CB	Van der Waals interaction	269	NH2	4.5	3.4
269	CD	Van der Waals interaction	361	CB	4.5	3.8
269	NE	Van der Waals interaction	361	CD1	4.5	3.6
366	CB	Van der Waals interaction	362	CE2	4.5	12.8
393	CD1	Van der Waals interaction	266	CD1	4.5	0.2
396	C	Van der Waals interaction	266	CB	4.5	1.1
396	C	Van der Waals interaction	266	C	4.5	2.2
161	CB	Van der Waals interaction	362	OH	4.6	3.8
162	O	Van der Waals interaction	362	CE2	4.6	1.7
162	ND2	Van der Waals interaction	161	CB	4.6	1.6
165	N	Van der Waals interaction	162	O	4.6	1.2
266	OH	Van der Waals interaction	269	NH1	4.6	1
361	CA	Van der Waals interaction	364	CD	4.6	2
362	CG	Van der Waals interaction	269	NH2	4.6	1.1
81	CD2	Van der Waals interaction	77	O	4.7	1.3
162	C	Van der Waals interaction	165	N	4.7	0.4
362	CB	Van der Waals interaction	269	NH1	4.7	0.9
77	O	Van der Waals interaction	80	CA	4.8	0.3
80	CB	Van der Waals interaction	77	O	4.8	2.7
81	CZ	Van der Waals interaction	77	O	4.8	2
138	CZ3	Van der Waals interaction	80	CE	4.8	15.9
162	OD1	Van der Waals interaction	366	CG	4.8	7.8
266	CB	Van der Waals interaction	393	CA	4.8	0.4
266	CG	Van der Waals interaction	393	CD1	4.8	0.4
362	CD2	Van der Waals interaction	366	CB	4.8	1.1
362	CE1	Van der Waals interaction	266	OH	4.8	1.8
362	CA	Van der Waals interaction	269	NH1	4.8	0.2
366	CB	Van der Waals interaction	162	OD1	4.8	0.9
366	SD	Van der Waals interaction	162	OD1	4.8	5.6
393	CB	Van der Waals interaction	266	OH	4.8	0.4
80	NZ	Van der Waals interaction	138	CZ3	4.9	6.3
81	CE2	Van der Waals interaction	77	O	4.9	2
361	CA	Van der Waals interaction	364	CG	4.9	0.9
362	CZ	Van der Waals interaction	161	O	4.9	0.4
362	CB	Van der Waals interaction	269	CZ	4.9	2.7
362	CB	Van der Waals interaction	269	NH2	4.9	0.9
393	CE1	Van der Waals interaction	266	OH	4.9	0.4
77	C	Van der Waals interaction	81	CD1	5	0.2
138	CB	Van der Waals interaction	135	O	5	0.4
269	NE	Van der Waals interaction	299	OE2	5	1.6
361	CB	Van der Waals interaction	269	NE	5	0.2
362	CZ	Van der Waals interaction	366	CB	5	0.4
362	CZ	Van der Waals interaction	366	N	5	1.3
362	CD2	Van der Waals interaction	162	O	5	1.8
366	CB	Van der Waals interaction	362	C	5	0.2
77	C	Van der Waals interaction	81	CE1	5.1	1.3
162	ND2	Van der Waals interaction	366	SD	5.1	7.3
165	CB	Van der Waals interaction	161	O	5.1	1.8
266	CE1	Van der Waals interaction	389	C	5.1	0.2
269	NH1	Van der Waals interaction	165	CD2	5.1	0.8
269	CD	Van der Waals interaction	361	O	5.1	1.6
362	CZ	Van der Waals interaction	162	O	5.1	0.2
162	CG	Van der Waals interaction	366	SD	5.2	2.5
266	OH	Van der Waals interaction	389	O	5.2	0.3
269	CZ	Van der Waals interaction	362	CA	5.2	0.2
269	NH2	Van der Waals interaction	299	CD	5.2	0.6
361	CG1	Van der Waals interaction	269	NE	5.2	0.2
366	CA	Van der Waals interaction	362	CE2	5.2	0.4
162	C	Van der Waals interaction	362	CZ	5.3	0.2
361	C	Van der Waals interaction	269	CD	5.3	0.2
362	OH	Van der Waals interaction	366	CB	5.3	0.5
366	CA	Van der Waals interaction	362	CZ	5.3	0.9
389	CA	Van der Waals interaction	266	CE1	5.3	3.8
393	OH	Van der Waals interaction	165	CD2	5.3	3.3
138	CE3	Van der Waals interaction	80	CE	5.4	3.1
161	CD1	Van der Waals interaction	162	ND2	5.4	0.9
162	ND2	Van der Waals interaction	161	CG	5.4	0.2
165	NE2	Van der Waals interaction	393	OH	5.4	0.6
366	CG	Van der Waals interaction	162	CG	5.4	0.2
362	OH	Van der Waals interaction	366	CA	5.5	0.5
80	CD	Van der Waals interaction	138	CZ3	5.6	0.4
80	CB	Van der Waals interaction	81	CD2	5.6	1.3
138	CH2	Van der Waals interaction	80	NZ	5.6	0.2
138	CZ2	Van der Waals interaction	161	CH2	5.6	9.2
393	CE1	Van der Waals interaction	165	CD2	5.6	1.3
161	CZ2	Van der Waals interaction	138	CZ2	5.7	4.7
165	CB	Van der Waals interaction	269	NH1	5.7	0.4
80	CD	Van der Waals interaction	138	CE3	5.8	1.3
266	OH	Van der Waals interaction	389	CA	5.8	0.9
269	NE	Van der Waals interaction	299	CD	5.8	0.4
362	OH	Van der Waals interaction	161	CE3	5.8	1.4
138	CH2	Van der Waals interaction	161	CH2	6	1.6
161	CZ3	Van der Waals interaction	138	CZ2	6	0.9
165	CB	Van der Waals interaction	362	CE1	6	3.8
138	CE2	Van der Waals interaction	161	CH2	6.1	0.4
138	CE3	Van der Waals interaction	80	CG	6.2	0.2
161	CZ3	Van der Waals interaction	138	CE2	6.2	0.9
362	CZ	Van der Waals interaction	165	CB	6.3	0.9
139	CG	Van der Waals interaction	80	CG	6.5	1.3
