# Supplementary material for: Integration of Evolutionary Features for the Identification of Functionally Important Residues in Major Facilitator Superfamily Transporters
Source: PLoS Comput Biol. 2009 Oct 2;5(10):e1000522. doi: 10.1371/journal.pcbi.1000522 (PMC2739438; doi:10.1371/journal.pcbi.1000522)
Supplement: Table S7 — List of central cavity residues in multidrug transporter EmrD. (0.13 MB XLS) [file pcbi.1000522.s015.xls]

## Sheet: Supplementary Table 7
Supplementary table 7. List of central cavity residues in multidrug transporter EmrD (EmrD).
SA (Solvent Accessibility) indicates that the relative accessibilities to the surface in protein structure with 1.2A probe.
TM indicates transmembrane helix.
TM	Residue	Position	SA*	Central cavity
-	LEU	9	136.83	-
-	LEU	10	112.2	-
-	LEU	11	112.98	-
1	MET	12	48.14	-
1	LEU	13	52.55	0
1	VAL	14	46.1	-
1	LEU	15	33.58	-
1	LEU	16	19.09	-
1	VAL	17	6.16	0
1	ALA	18	3.9	-
1	VAL	19	0	-
1	GLY	20	1.88	0
1	GLN	21	9.81	0
1	MET	22	2.66	-
1	ALA	23	17.13	-
1	GLN	24	32.11	0
1	THR	25	0.78	0
1	ILE	26	13.04	-
1	TYR	27	27.4	0
1	ILE	28	50.07	0
1	PRO	29	1.05	-
1	ALA	30	37.36	-
1	ILE	31	12.19	-
1	ALA	32	1.65	0
-	ASP	33	16.26	-
-	MET	34	63.54	-
-	ALA	35	2.04	-
-	ARG	36	91.57	-
-	ASP	37	102.34	-
-	LEU	38	31.4	-
-	ASN	39	117.93	-
-	VAL	40	83.65	-
-	ARG	41	140.14	-
-	GLU	42	17.75	-
2	GLY	43	43.13	-
2	ALA	44	19.32	-
2	VAL	45	9.31	0
2	GLN	46	29.68	0
2	SER	47	55.68	-
2	VAL	48	29.09	0
2	MET	49	35.9	0
2	GLY	50	17.88	0
2	ALA	51	28.63	-
2	TYR	52	79.51	0
2	LEU	53	42.88	0
2	LEU	54	101.11	-
2	THR	55	6.51	-
2	TYR	56	53.47	0
2	GLY	57	8.75	0
2	VAL	58	74.7	-
2	SER	59	6.3	-
-	GLN	60	22.48	-
-	LEU	61	33.37	-
-	PHE	62	88.7	-
-	TYR	63	27.89	-
-	GLY	64	21.91	-
-	PRO	65	14.74	-
-	ILE	66	81.91	-
-	SER	67	24.82	-
-	ASP	68	28.92	-
-	ARG	69	127.48	-
-	VAL	70	72.76	-
-	GLY	71	12.99	-
3	ARG	72	76.98	-
3	ARG	73	128.51	-
3	PRO	74	56.49	-
3	VAL	75	101.85	-
3	ILE	76	28.18	-
3	LEU	77	2.01	-
3	VAL	78	73.91	-
3	GLY	79	13.88	-
3	MET	80	33.08	-
3	SER	81	8.61	-
3	ILE	82	100.37	-
3	PHE	83	118.65	-
3	MET	84	13.97	-
3	LEU	85	89.21	-
3	ALA	86	55.7	-
3	THR	87	18.38	-
3	LEU	88	50.7	-
-	VAL	89	112.14	-
-	ALA	90	40.07	-
-	VAL	91	15.13	-
-	THR	92	71.5	-
-	THR	93	106.46	-
-	SER	94	27.55	-
-	SER	95	10.96	-
-	LEU	96	95.36	-
-	THR	97	70.27	-
-	VAL	98	96.64	-
4	LEU	99	40.12	-
4	ILE	100	33.07	-
4	ALA	101	42.08	-
4	ALA	102	45.44	-
4	SER	103	38.43	0
4	ALA	104	8.93	0
4	MET	105	70	-
4	GLN	106	46.25	-
4	GLY	107	5.01	0
4	MET	108	17.59	0
4	GLY	109	2.05	-
4	THR	110	5.33	0
4	GLY	111	11.25	0
4	VAL	112	12.22	-
4	GLY	113	14.6	-
4	GLY	114	8.5	0
4	VAL	115	14.26	0
-	MET	116	45.95	-
-	ALA	117	1.78	-
-	ARG	118	41.71	-
-	THR	119	37.16	-
-	LEU	120	91.61	-
-	PRO	121	19.67	-
-	ARG	122	61.64	-
-	ASP	123	94.29	-
-	LEU	124	90.57	-
-	TYR	125	75.22	-
-	GLU	126	144.77	-
-	ARG	127	177.4	-
-	THR	128	103.8	-
-	GLN	129	103.71	-
-	LEU	130	63.11	-
-	ARG	131	81.63	-
-	HIS	132	16.49	-
-	ALA	133	13.01	-
-	ASN	134	53.36	-
-	SER	135	12.05	-
-	LEU	136	24.79	-
5	LEU	137	67.6	-
5	ASN	138	37.26	-
5	MET	139	29.13	0
5	GLY	140	8.22	0
5	ILE	141	89.84	-
5	LEU	142	46.14	-
5	VAL	143	7.08	0
5	SER	144	10.53	-
5	PRO	145	63.38	-
5	LEU	146	79.37	-
5	LEU	147	0.26	-
5	ALA	148	15.91	-
5	PRO	149	90.05	-
5	LEU	150	20.11	-
5	ILE	151	27.06	0
5	GLY	152	39.33	-
5	GLY	153	32.63	-
-	LEU	154	141.44	-
-	LEU	155	124.87	-
-	ASP	156	63.85	-
-	THR	157	7	-
6	MET	158	58.6	-
6	TRP	159	194.99	-
6	ASN	160	52.69	-
6	TRP	161	57.72	-
6	ARG	162	51.34	-
6	ALA	163	48.51	-
6	CYS	164	25.1	-
6	TYR	165	8.52	-
6	LEU	166	50.19	-
6	PHE	167	104.95	-
6	LEU	168	22.55	-
6	LEU	169	3.64	-
6	VAL	170	64.62	-
6	LEU	171	69.2	-
6	CYS	172	0.7	-
6	ALA	173	30.62	-
6	GLY	174	59.41	-
6	VAL	175	73.11	-
6	THR	176	6.5	-
6	PHE	177	154.6	-
-	SER	178	41.85	-
-	MET	179	83.07	-
-	ALA	180	37.09	-
-	ARG	181	175.43	-
-	TRP	182	225.66	-
-	MET	183	94.73	-
-	PRO	184	92.52	-
-	GLU	185	102.37	-
-	THR	186	42.89	-
-	ARG	187	103.18	-
-	PRO	188	88.23	-
-	VAL	189	117.72	-
-	ASP	190	61.19	-
-	ALA	191	30.65	-
-	PRO	192	39.26	-
-	ARG	193	188.54	-
-	THR	194	96.76	-
-	ARG	195	140.41	-
-	LEU	196	43.83	-
-	LEU	197	116.24	-
-	THR	198	108.6	-
-	SER	199	21.95	-
-	TYR	200	168.67	-
-	LYS	201	143.43	-
-	THR	202	61.32	-
-	LEU	203	89.91	-
-	PHE	204	158.42	-
-	GLY	205	37.95	-
-	ASN	206	48.32	-
-	SER	207	32.33	-
-	GLY	208	22.47	-
-	PHE	209	70.54	-
-	ASN	210	43.85	-
-	CYS	211	48.62	-
-	TYR	212	3.73	-
-	LEU	213	4.86	-
-	LEU	214	34.13	-
7	MET	215	70.29	-
7	LEU	216	0.86	-
7	ILE	217	14.53	0
7	GLY	218	0.44	-
7	GLY	219	17.35	-
7	LEU	220	6.35	0
7	ALA	221	15.75	0
7	GLY	222	13.39	-
7	ILE	223	13.57	-
7	ALA	224	21.38	0
7	ALA	225	4.11	-
7	PHE	226	75.31	-
7	GLU	227	11.75	0
7	ALA	228	25.63	0
7	CYS	229	32.93	0
7	SER	230	60.84	-
7	GLY	231	35.39	-
-	VAL	232	93.12	-
-	LEU	233	4.33	-
-	MET	234	82.98	-
-	GLY	235	34.39	-
-	ALA	236	64.54	-
-	VAL	237	64.35	-
8	LEU	238	4.41	0
8	GLY	239	0.62	-
8	LEU	240	50.87	-
8	SER	241	31.88	0
8	SER	242	0	-
8	MET	243	44.63	-
8	THR	244	36.48	-
8	VAL	245	15.53	0
8	SER	246	0	-
8	ILE	247	71.96	-
8	LEU	248	33.9	-
8	PHE	249	29.27	0
8	ILE	250	37.43	0
8	LEU	251	107.84	-
8	PRO	252	14.21	-
8	ILE	253	3.11	0
8	PRO	254	58.2	-
8	ALA	255	58.66	-
-	ALA	256	3.79	-
-	PHE	257	50.82	-
-	PHE	258	131.79	-
-	GLY	259	10.85	-
-	ALA	260	22.17	-
-	TRP	261	112.45	-
-	PHE	262	50.12	-
-	ALA	263	10.44	-
-	GLY	264	48.29	-
-	ARG	265	148.09	-
-	PRO	266	63.72	-
-	ASN	267	30.14	-
-	LYS	268	7.78	-
-	ARG	269	3.81	-
-	PHE	270	93.29	-
-	SER	271	20.16	-
9	THR	272	1.24	-
9	LEU	273	33.14	-
9	MET	274	65.88	-
9	TRP	275	81.55	-
9	GLN	276	6.28	-
9	SER	277	34.41	-
9	VAL	278	39.95	-
9	ILE	279	18.83	-
9	CYS	280	32.02	-
9	CYS	281	69.18	-
9	LEU	282	36.52	-
9	LEU	283	76.36	-
9	ALA	284	82.71	-
9	GLY	285	46.89	-
9	LEU	286	112.79	-
9	LEU	287	133.99	-
9	MET	288	139.16	-
-	TRP	289	166.58	-
10	ILE	290	80.65	-
10	PRO	291	17.25	-
10	ASP	292	36.82	-
10	TRP	293	56.15	-
10	PHE	294	29.31	-
10	GLY	295	2.36	-
10	VAL	296	33.77	0
10	MET	297	52.6	-
10	ASN	298	3.8	-
10	VAL	299	19.68	-
10	TRP	300	42.59	0
10	THR	301	25.45	-
10	LEU	302	1.84	-
10	LEU	303	49.39	0
10	VAL	304	18.08	0
-	PRO	305	6.67	-
-	ALA	306	2.05	-
-	ALA	307	40.29	-
-	LEU	308	12.78	-
-	PHE	309	56.27	-
-	PHE	310	20.75	-
-	PHE	311	41.93	-
-	GLY	312	28.5	-
-	ALA	313	69.92	-
-	GLY	314	7.54	-
-	MET	315	68.6	-
-	LEU	316	153.09	-
-	PHE	317	115.82	-
-	PRO	318	112.67	-
-	LEU	319	76.74	-
-	ALA	320	44.59	-
-	THR	321	66.68	-
-	SER	322	33.69	-
-	GLY	323	0.27	-
-	ALA	324	14.14	-
-	MET	325	41.07	-
-	GLU	326	45.07	-
-	PRO	327	15.63	-
-	PHE	328	23.08	-
-	PRO	329	48.13	-
-	PHE	330	62.75	-
-	LEU	331	25.91	-
11	ALA	332	27.72	0
11	GLY	333	40.31	-
11	THR	334	23.54	-
11	ALA	335	3.11	0
11	GLY	336	41.93	0
11	ALA	337	69.01	-
11	LEU	338	71.4	-
11	VAL	339	38.02	0
11	GLY	340	34.64	-
11	GLY	341	42.98	-
11	LEU	342	30.78	0
11	GLN	343	128.75	-
11	ASN	344	96.63	-
11	ILE	345	75.97	-
11	GLY	346	34.2	-
11	SER	347	86.84	-
11	GLY	348	55.31	-
11	VAL	349	52.47	-
-	LEU	350	148.7	-
-	ALA	351	56.22	-
-	SER	352	93.25	-
-	LEU	353	179.24	-
-	SER	354	16.64	-
12	ALA	355	65.86	-
12	MET	356	138.88	-
12	LEU	357	103.78	-
12	PRO	358	30.82	-
12	GLN	359	42.65	-
12	THR	360	84.73	-
12	GLY	361	38.34	-
12	GLN	362	14.52	-
12	GLY	363	17.42	-
12	SER	364	58.47	-
12	LEU	365	3.76	-
12	GLY	366	0.68	-
12	LEU	367	96.02	-
12	LEU	368	48.71	-
12	MET	369	0	-
12	THR	370	41.72	-
-	LEU	371	98.32	-
-	MET	372	9.08	-
-	GLY	373	0.67	-
-	LEU	374	117.55	-
-	LEU	375	126.04	-
-	ILE	376	26.46	-
-	VAL	377	59.35	-
-	LEU	378	139.11	-
-	CYS	379	69.74	-
-	TRP	380	228.07	-
-	LEU	381	143.85	-
-	PRO	382	117.54	-
-	LEU	383	208.11	-
