# Supplementary material for: Integration of Evolutionary Features for the Identification of Functionally Important Residues in Major Facilitator Superfamily Transporters
Source: PLoS Comput Biol. 2009 Oct 2;5(10):e1000522. doi: 10.1371/journal.pcbi.1000522 (PMC2739438; doi:10.1371/journal.pcbi.1000522)
Supplement: Table S8 — Interaction network of detected residues in EmrD. (0.12 MB XLS) [file pcbi.1000522.s016.xls]

## Sheet: Supplementary Table 8
Supplementary table 8. Interaction network of detected residues in EmrD
Position_A	Atom_A	Type of contacts	Position_B	Atom_B	Interatomic distance(Å)	Van der Waals surface (Å2)
25	N	Van der Waals interaction	24	C	1.3	56.8
28	N	Van der Waals interaction	27	C	1.3	56.4
149	N	Van der Waals interaction	148	C	1.4	56.8
24	O	Van der Waals interaction	25	N	2.2	0.3
27	O	Van der Waals interaction	28	N	2.2	0.5
148	O	Van der Waals interaction	149	N	2.3	0.5
25	CA	Van der Waals interaction	24	C	2.4	3.4
28	CA	Van der Waals interaction	27	C	2.4	3.6
149	CA	Van der Waals interaction	148	C	2.4	4.9
25	N	Van der Waals interaction	24	CA	2.4	4.9
28	N	Van der Waals interaction	27	CA	2.4	4.6
148	O	Van der Waals interaction	149	CA	2.6	8.1
28	N	Van der Waals interaction	27	N	2.6	6.7
24	O	Van der Waals interaction	25	CA	2.7	7.3
27	O	Van der Waals interaction	28	CA	2.7	5
25	O	Van der Waals interaction	28	N	2.7	6.6
149	CD	Van der Waals interaction	145	O	2.7	24
21	O	Van der Waals interaction	25	OG1	2.7	23.2
24	O	Hydrogen-bond/salt-bridge	27	N	2.8	5.4
148	N	Hydrogen-bond/salt-bridge	145	O	2.8	6.5
25	N	Van der Waals interaction	24	CB	2.8	5.9
24	O	Van der Waals interaction	27	CG	2.8	26
21	O	Van der Waals interaction	25	N	2.8	9.2
25	C	Van der Waals interaction	24	O	2.8	5.4
28	C	Van der Waals interaction	27	O	2.8	3.6
27	C	Van der Waals interaction	28	C	2.9	3.1
149	C	Van der Waals interaction	148	O	2.9	2.7
153	CA	Van der Waals interaction	149	O	2.9	19.7
27	CD1	Van der Waals interaction	24	O	2.9	5.4
332	O	Hydrogen-bond/salt-bridge	336	N	3	17.2
336	O	Hydrogen-bond/salt-bridge	340	N	3	19.2
24	C	Van der Waals interaction	25	C	3	0.2
148	CB	Van der Waals interaction	149	CD	3	14.6
28	N	Van der Waals interaction	27	CD1	3	4.9
161	O	Van der Waals interaction	165	N	3	20.6
28	CB	Van der Waals interaction	25	O	3	7.4
27	CD2	Van der Waals interaction	24	O	3	5.2
28	O	Van der Waals interaction	27	O	3	3.5
149	N	Van der Waals interaction	148	N	3.1	0.2
227	CG	Van der Waals interaction	224	O	3.1	10.3
24	N	Van der Waals interaction	21	O	3.1	0.6
153	N	Van der Waals interaction	149	O	3.1	3.6
153	N	Van der Waals interaction	149	C	3.2	2
24	CG	Van der Waals interaction	25	N	3.2	0.9
27	CD2	Van der Waals interaction	24	CA	3.3	0.9
24	CA	Van der Waals interaction	27	CE2	3.3	10.8
27	CE1	Van der Waals interaction	24	O	3.3	3.6
28	CG1	Van der Waals interaction	25	O	3.3	3.4
161	O	Van der Waals interaction	165	CB	3.4	5
24	CB	Van der Waals interaction	21	O	3.4	4
224	CA	Van der Waals interaction	227	OE1	3.4	13.2
153	CA	Van der Waals interaction	149	C	3.5	1.3
227	CD	Van der Waals interaction	224	CA	3.5	4.5
27	CZ	Van der Waals interaction	24	O	3.5	2
149	CG	Van der Waals interaction	148	C	3.6	0.2
149	CA	Van der Waals interaction	153	N	3.6	6.5
148	CB	Van der Waals interaction	145	O	3.6	2.2
149	CD	Van der Waals interaction	145	C	3.7	2.5
21	CA	Van der Waals interaction	24	CB	3.7	7.4
21	C	Van der Waals interaction	25	OG1	3.7	0.9
28	CA	Van der Waals interaction	27	CD1	3.8	2.2
25	CA	Van der Waals interaction	28	CG1	3.8	5.8
24	CG	Van der Waals interaction	27	OH	3.8	8.5
153	CA	Van der Waals interaction	149	CA	3.9	2.7
28	CD1	Van der Waals interaction	25	CA	3.9	13.9
28	CD1	Van der Waals interaction	25	CG2	3.9	11.2
28	CD1	Van der Waals interaction	25	O	3.9	0.2
28	CG1	Van der Waals interaction	24	O	3.9	2.9
27	CZ	Van der Waals interaction	24	C	4	0.4
27	CZ	Van der Waals interaction	24	CA	4	1.8
27	CZ	Van der Waals interaction	24	CG	4	0.7
27	CE1	Van der Waals interaction	28	CG1	4	11.7
27	CE1	Van der Waals interaction	28	N	4	0.9
336	CA	Van der Waals interaction	332	O	4	2.5
340	CA	Van der Waals interaction	336	O	4	2.5
224	CB	Van der Waals interaction	227	OE1	4	4.7
24	OE1	Van der Waals interaction	25	CG2	4.1	12.8
24	CD	Van der Waals interaction	25	N	4.1	0.4
24	C	Van der Waals interaction	27	CE1	4.1	0.2
24	CB	Van der Waals interaction	27	CE2	4.1	0.9
24	NE2	Van der Waals interaction	21	CA	4.3	4.4
24	CG	Van der Waals interaction	25	CA	4.3	0.7
145	CA	Van der Waals interaction	149	CD	4.3	3.6
149	CG	Van der Waals interaction	148	CB	4.3	0.2
252	CB	Van der Waals interaction	249	O	4.3	1.3
25	CG2	Van der Waals interaction	249	CE1	4.4	4.7
249	CE1	Van der Waals interaction	24	OE1	4.4	16.6
24	CD	Van der Waals interaction	21	CA	4.5	3.4
27	CE1	Van der Waals interaction	28	CA	4.5	0.4
24	C	Van der Waals interaction	28	CG1	4.6	0.2
145	CA	Van der Waals interaction	148	CB	4.6	1.6
149	CB	Van der Waals interaction	153	CA	4.6	2.5
24	CG	Van der Waals interaction	25	CG2	4.7	0.2
21	CB	Van der Waals interaction	24	CB	4.8	0.2
21	CB	Van der Waals interaction	24	NE2	4.8	4
24	CD	Van der Waals interaction	25	CG2	4.8	0.4
27	CE1	Van der Waals interaction	24	CG	4.8	0.2
27	CE1	Van der Waals interaction	48	CG1	4.8	11.4
103	O	Van der Waals interaction	27	CD2	4.8	0.7
24	CD	Van der Waals interaction	21	CB	5	0.7
249	CZ	Van der Waals interaction	25	CG2	5	0.4
27	CB	Van der Waals interaction	103	O	5.1	1.6
28	CD1	Van der Waals interaction	24	C	5.1	0.2
28	CD1	Van der Waals interaction	27	CE1	5.1	0.2
145	CB	Van der Waals interaction	149	CD	5.1	1.8
249	CZ	Van der Waals interaction	24	OE1	5.1	0.7
24	OE1	Van der Waals interaction	21	CB	5.2	0.5
161	CD1	Van der Waals interaction	165	CB	5.2	0.4
103	C	Van der Waals interaction	27	CB	5.3	2
48	O	Van der Waals interaction	27	CE1	5.7	0.9
24	CG	Van der Waals interaction	28	CD1	5.8	1.8
24	OE1	Van der Waals interaction	28	CD1	5.8	0.3
149	CG	Van der Waals interaction	145	CB	5.8	0.7
161	CZ2	Van der Waals interaction	103	OG	5.8	0.4
21	NE2	Van der Waals interaction	24	NE2	5.9	0.2
249	CZ	Van der Waals interaction	28	CD1	5.9	1.3
28	CA	Van der Waals interaction	48	CG1	6.1	0.7
103	CB	Van der Waals interaction	27	CB	6.2	0.4
103	CB	Van der Waals interaction	161	CZ2	6.2	1.6
149	CD	Van der Waals interaction	148	C	x	6.3
