# Supplementary material for: Integration of Evolutionary Features for the Identification of Functionally Important Residues in Major Facilitator Superfamily Transporters
Source: PLoS Comput Biol. 2009 Oct 2;5(10):e1000522. doi: 10.1371/journal.pcbi.1000522 (PMC2739438; doi:10.1371/journal.pcbi.1000522)
Supplement: Table S10 — Identified functional residues of membrane protein transporters. (0.11 MB XLS) [file pcbi.1000522.s018.xls]

## Sheet: Supplementary Table 10
Supplementary table 10. Identified functional residues of membrane protein transporters.
Family	PDB	Chain	Protein name	Identified residues
				Cavity	Non-cavity
MFS	2CFQ	A	Lactose permease	E126, R144, G147, Y236, D240, Q241, Q242, F261, G262, M276, K319, H322, E325, P327, Y350, L351, S366	L84, P89, S174, A273, L292, M299, R302, S396
K+ channel	1ORQ	C	KvAP voltage-gated K+ Channel	V244, I241, V170, S245, M247, L240, F167	Y164, G177, S235, L237
MFS	1PW4	A	Glycerol-3-Phosphate Transporter	E299, G77, Y393, P364, H165, Y266, R269, G169, G389, N162, Y362, M366, P139, W138, K80, I361, L280, W161	G135, G396, G168, F81, S79, F417, G99
ABC transporter	3D31	C	Sulfate/molybdate ABC transporter	D102, V105, V106, H109, M147, N157, S210, F212, A214	V215, F256, R260
MFS	2GFP	A	Multidrug drug transporter	S103, T25, G336, V48, A332, Q24, A224, I28, Q21, E227, Y27, L13, F249	Y165, P145, G340, P149, W161, A148, P252, G153
K+ channel	2R9R	B	Kv1.2 voltage-gated K+ channel	E327, S344, K388, V399, L400, L404	R240, P265, S311, V406, G391, I296, V301
GPCR	1E12	A	Chloride pump halorhodopsin	Y77, L80, T111, S115, T116, M144, G148, W207, T230, K242	A40, T66, M118, L120, L179
ATPase	3B8E	A	Na+/K+ ATPase	F98, V138, G333, T337, I774, Y776, T777, G801, T804, I805, I808, D809, D813, L847, I855	G96, G97, F144, Q928, K936, D1000
GPCR	1H2S	A	Sensory rhodopsin 2	A50, Y174, P175, I177, V198	T80, L200, K205, T79, V53, G112, A47
GPCR	2EI4	A	Archaerhodopsin 2	M30, T56, M70, D96, T100, I130, W193, E215, G231	A63, A92, L222, V228
GPCR	1C3W	A	Bacteriorhodopsin	M73, D98, T103, I132, K229	M33, L224, A66, T59, V230, A94, G233, T102, F184, D128, L105
GPCR	1L9H	A	Rhodopsin	M86, V157, Y178, M207, L262, I275, A295, Y301	L77, M253, N111, S202, V129, C222, I307, F203, N78, A80
ATPase	1WPG	A	P-type Ca2+ ATPase	N275, A301, L302, A306, F760, L764, I765, S766, F776, A786, Q791, Y837	D59, A68, E90, I97, I307, A313, A806, G808, A900, L916
ATPase	3B8C	A	Plasma membrane ATPase	M73, E74, A76, A80, D95, L102, N106, G283, A288, A649, S672, A680, N683, I687, I690, K838	T653, V72, V657, V725, P68
GPCR	1UAZ	A	Archaerhodopsin 1	T101, T102, I131, E216, L236	M72, D97, M32, A65, T58, G77, G232, V229, L223, L104, A93
We identified functional residues withing the top 10% of IS.
